# Supplementary material
Source: publisher site journal article supplement (https://www.dovepress.com/article/496007)

Supplementary Material

**Supplementary Figures**

**Supplementary figure 1.**

Results of the Bootstrap internal validation of Clinical-SIRI model(AUC=0.788 95%CI:0.738-0.838).

SIRI, Systemic inflammation response index; AUC, area under the curve; CI, confidence interval


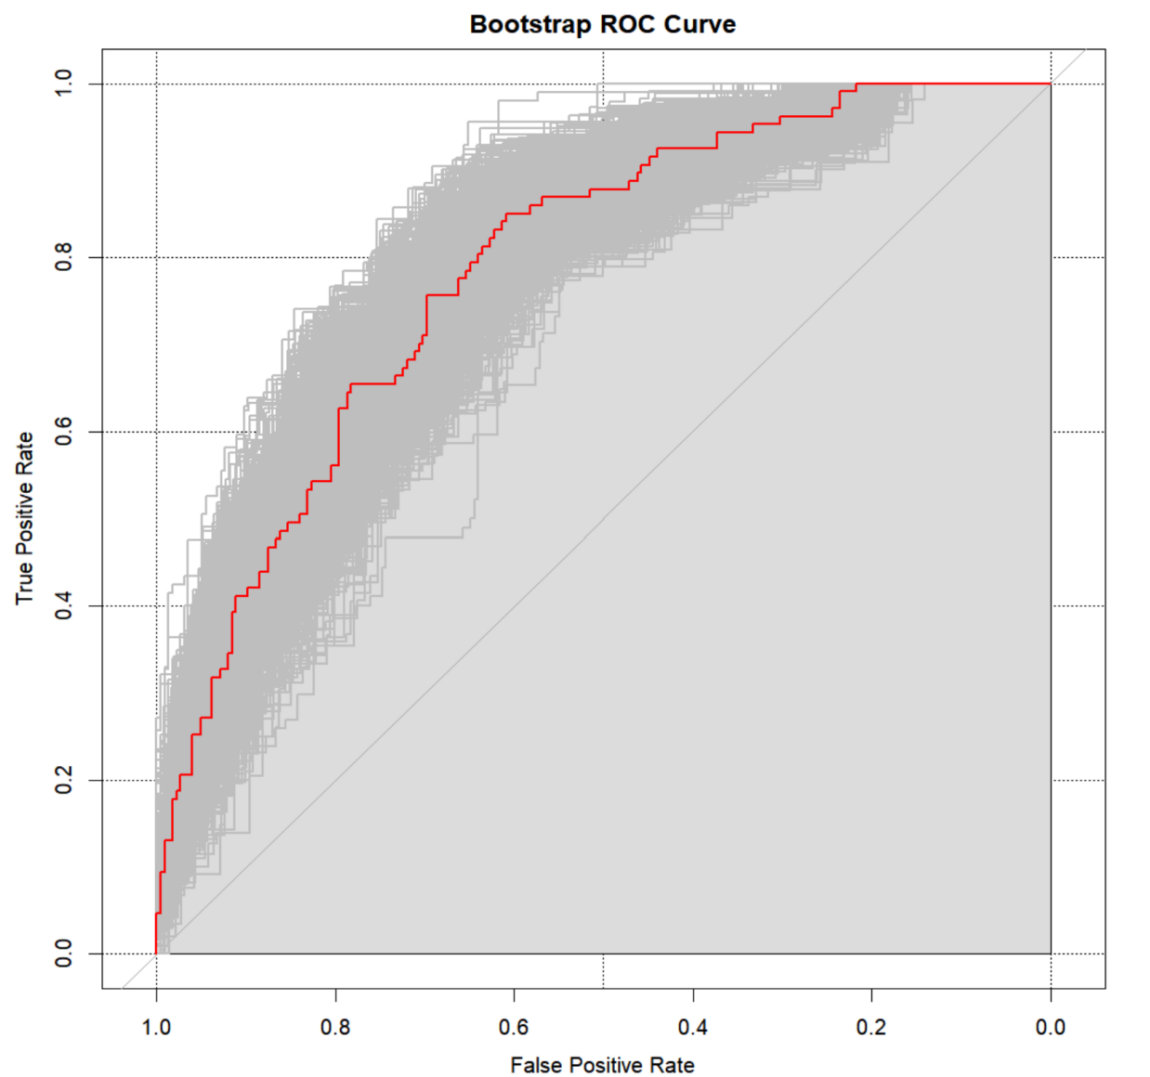


**Supplemental Figure 2.** CIC of the Clinical-SIRI model. The two horizontal axes depict this correspondence. The solid red lines indicate the total number of high-risk patients for each risk threshold out of a sample size of 1,000 patients. The dashed blue line represents the number of actual positive events that occur in high-risk patients.

CIC, clinical impact curves, SIRI, systemic inflammation response index.


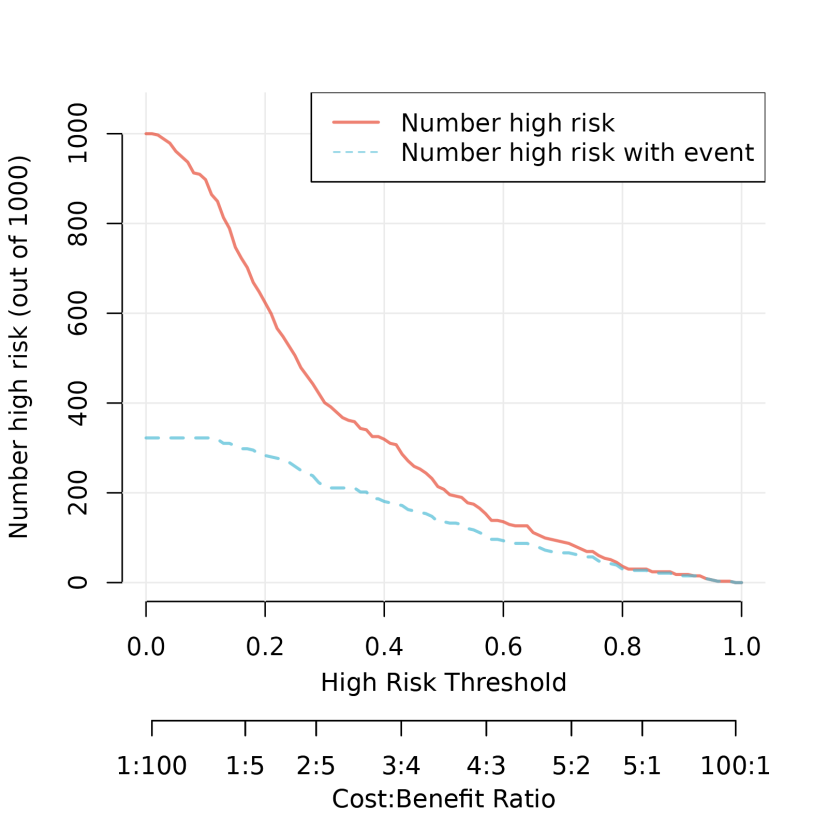

Supplement: Supplementary file 1 [file get_supplementary_file.php]
